# Supplementary material for: Consumption of a green tea extract–curcumin drink decreases blood urea nitrogen and redox iron in β-thalassemia patients
Source: Royal Society of Chemistry journal article supplement (doi:10.1039/c9fo02424g), 2019-12-26
Supplement: c9fo02424g1.pdf [file c9fo02424g1.pdf]

### Supplementary Figures

**Fig. S1** HPLC profile of catechins in the GTE-CUR drink.

**Fig. S2** HPLC profile of curcuminoids in the GTE-CUR drink.

**Fig. S3** HPLC profile of caffeine in the GTE-CUR drink.

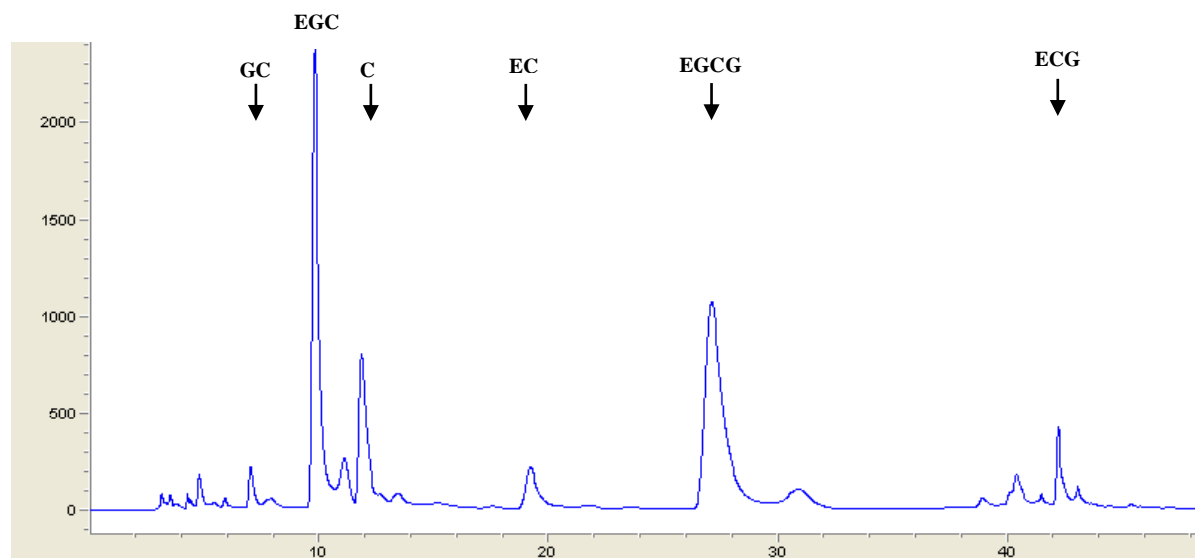

**Fig. S1** HPLC profile of catechins in the GTE-CUR drink.

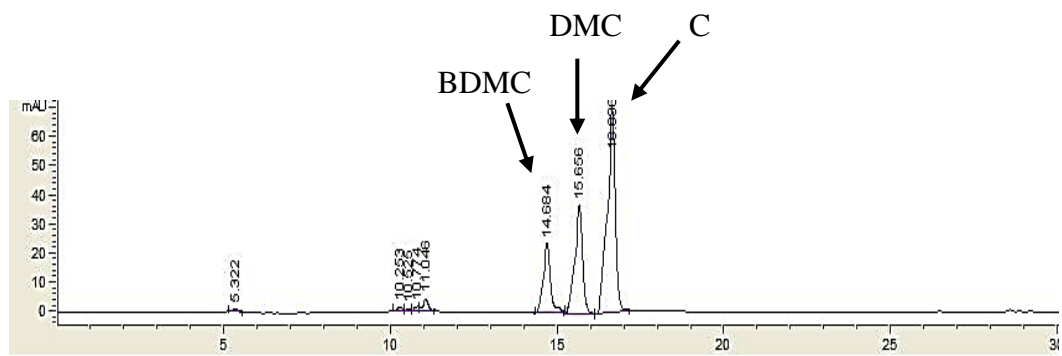

**Fig. S2** HPLC profile of curcuminoids in the GTE-CUR drink.

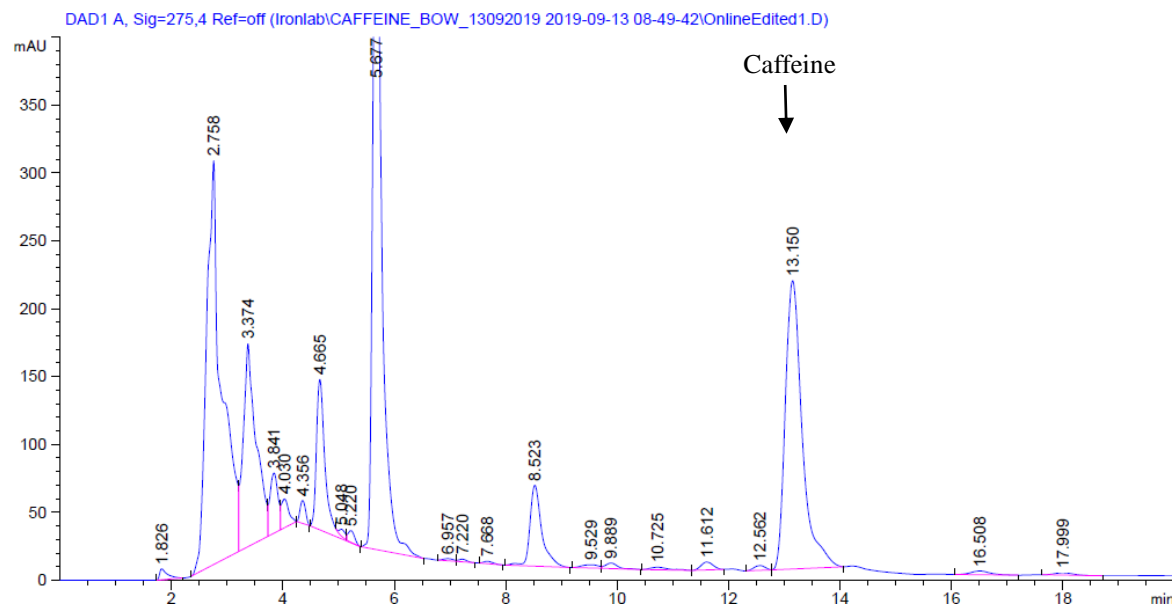

**Fig. S3** HPLC profile of caffeine in the GTE-CUR drink.
